# Supplementary material for: Effect of Dietary Carbohydrate-to-Protein Ratio on Gut Microbiota in Atlantic Salmon (Salmo salar)
Source: PubMed Central journal article supplement (PMC6466077; doi:10.3390/ani9030089), 2019-03-11
Supplement: animals-09-00089-s001.pdf [file animals-09-00089-s001.pdf]

## Supplementary Materials

**Table 1.** Number of reads (no chimera) per sample.

| <b>ID Fish</b> | <b>Experimental Diet</b> | <b>Number of Sequences</b> |
|----------------|--------------------------|----------------------------|
| F1D1           | MC/MP                    | 36.784                     |
| F2D1           | MC/MP                    | 40.814                     |
| F3D1           | MC/MP                    | 36.731                     |
| F4D1           | MC/MP                    | 33.142                     |
| F5D1           | MC/MP                    | 36.944                     |
| F6D1           | MC/MP                    | 41.457                     |
| F1D2           | HC/HP                    | 44.906                     |
| F2D2           | HC/HP                    | 27.609                     |
| F3D2           | HC/HP                    | 32.002                     |
| F4D2           | HC/HP                    | 23.528                     |
| F5D2           | HC/HP                    | 35.279                     |
